# Supplementary material for: Recent Duplications Dominate VQ and WRKY Gene Expansions in Six Prunus Species
Source: Hindawi journal article supplement (doi:10.1155/2021/4066394), 2021-12-17

**a**

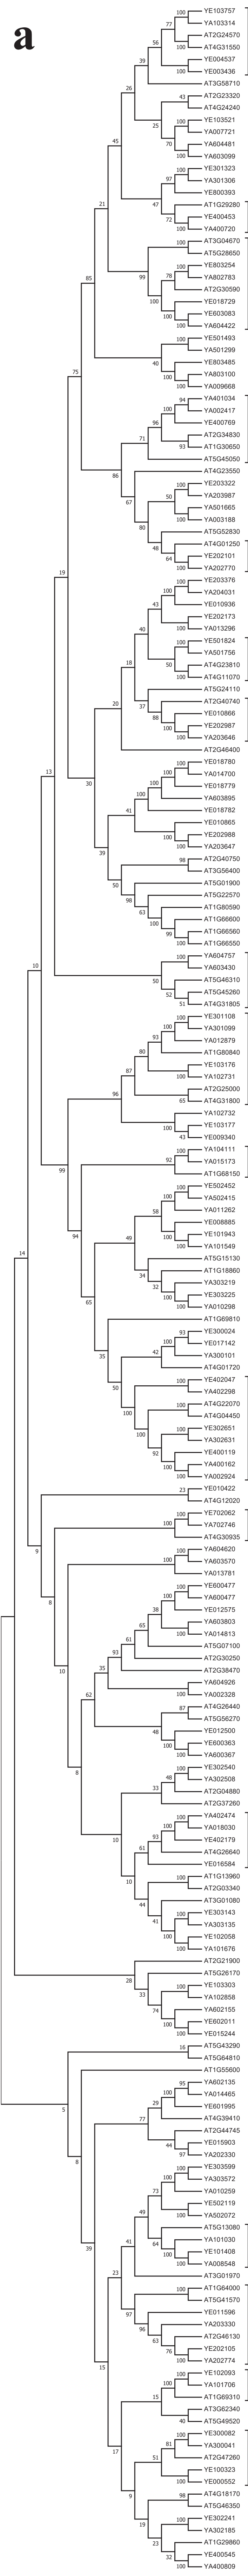

**b**

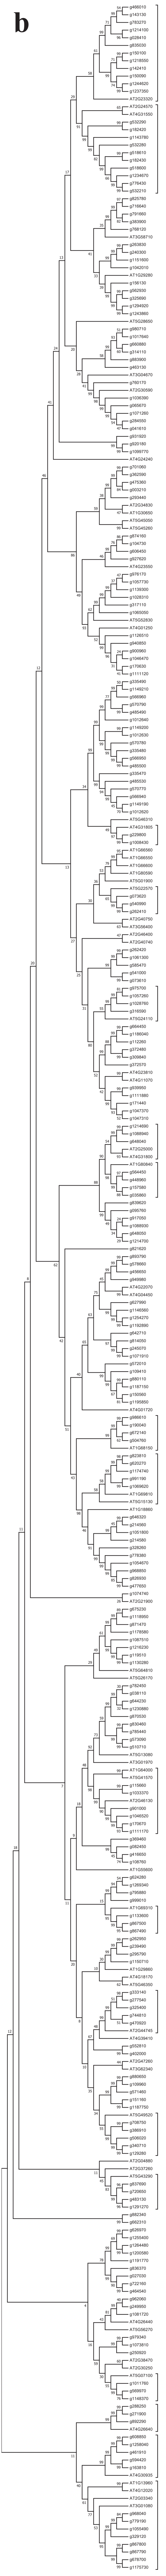

c

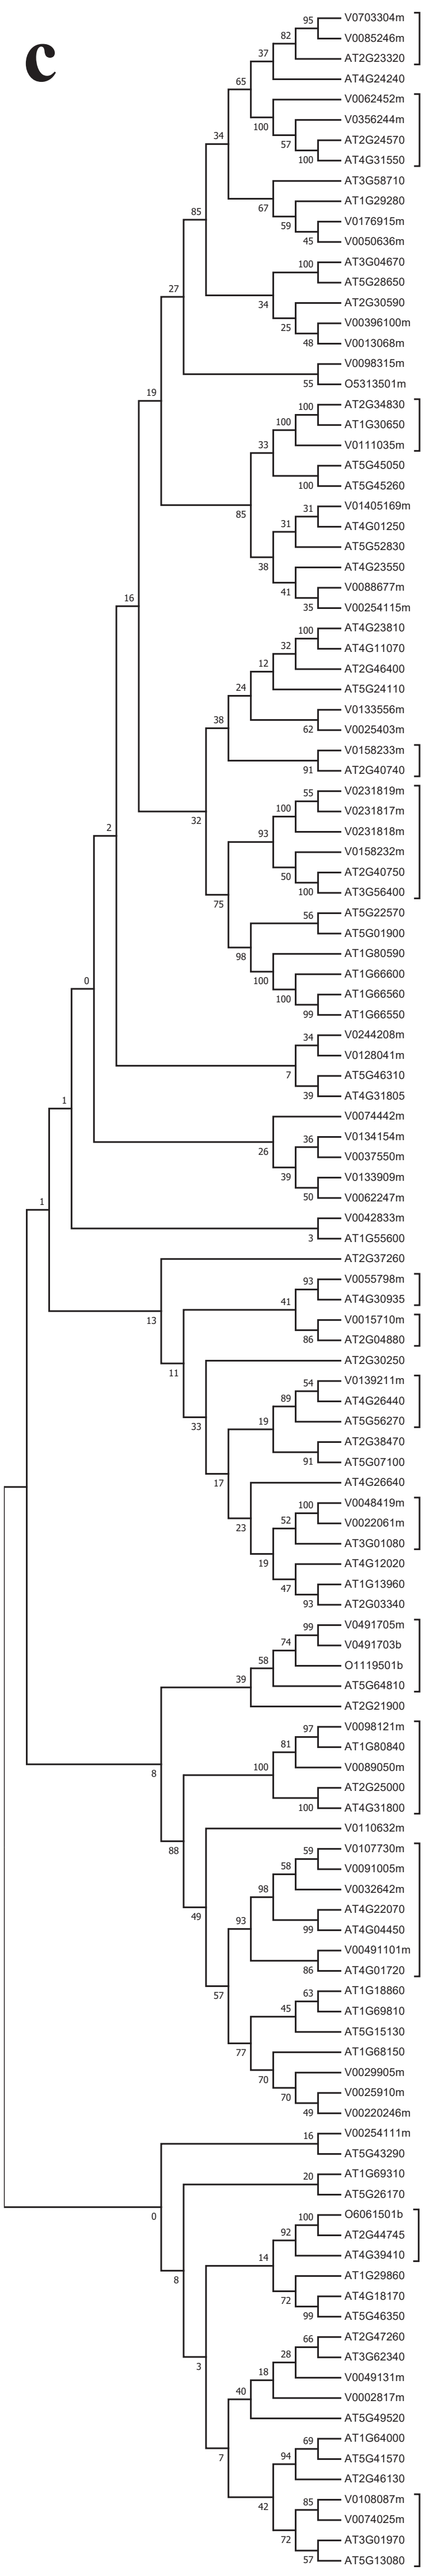

d

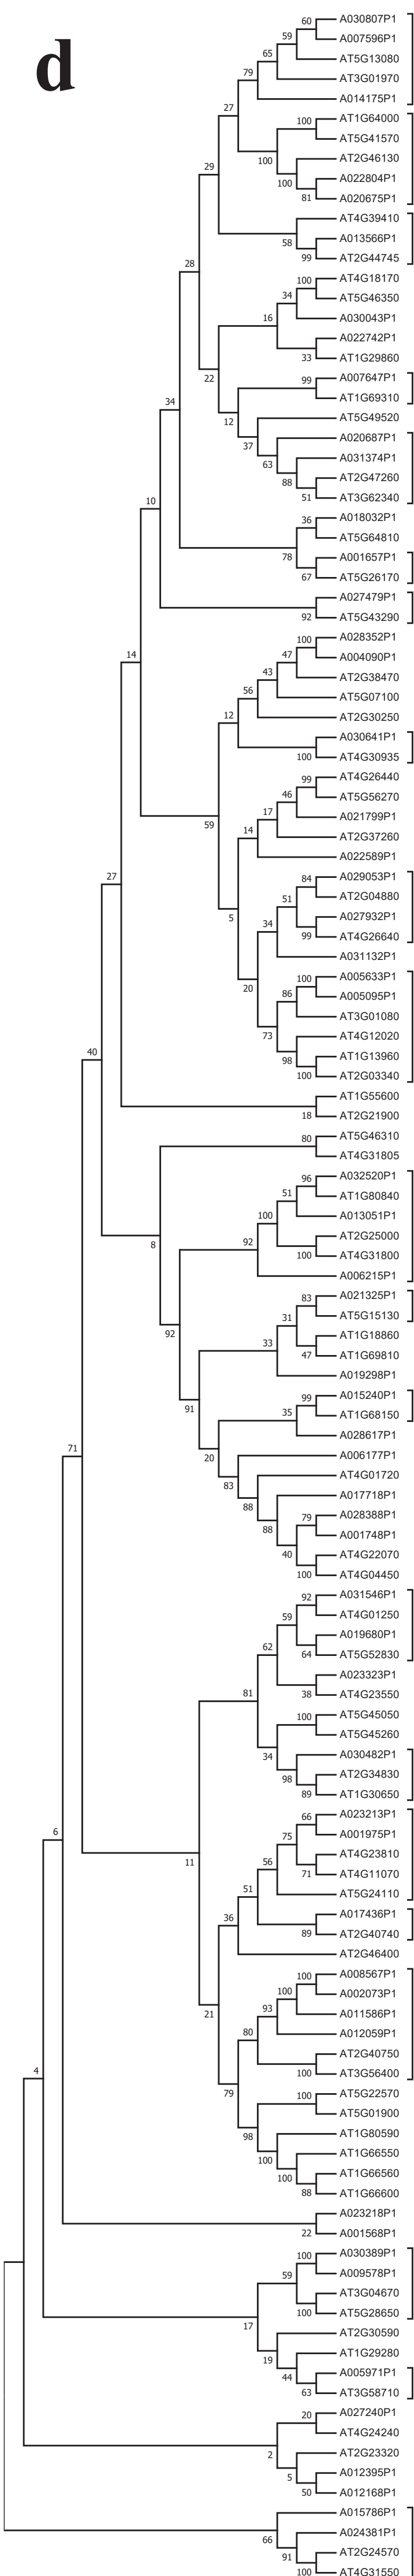

e

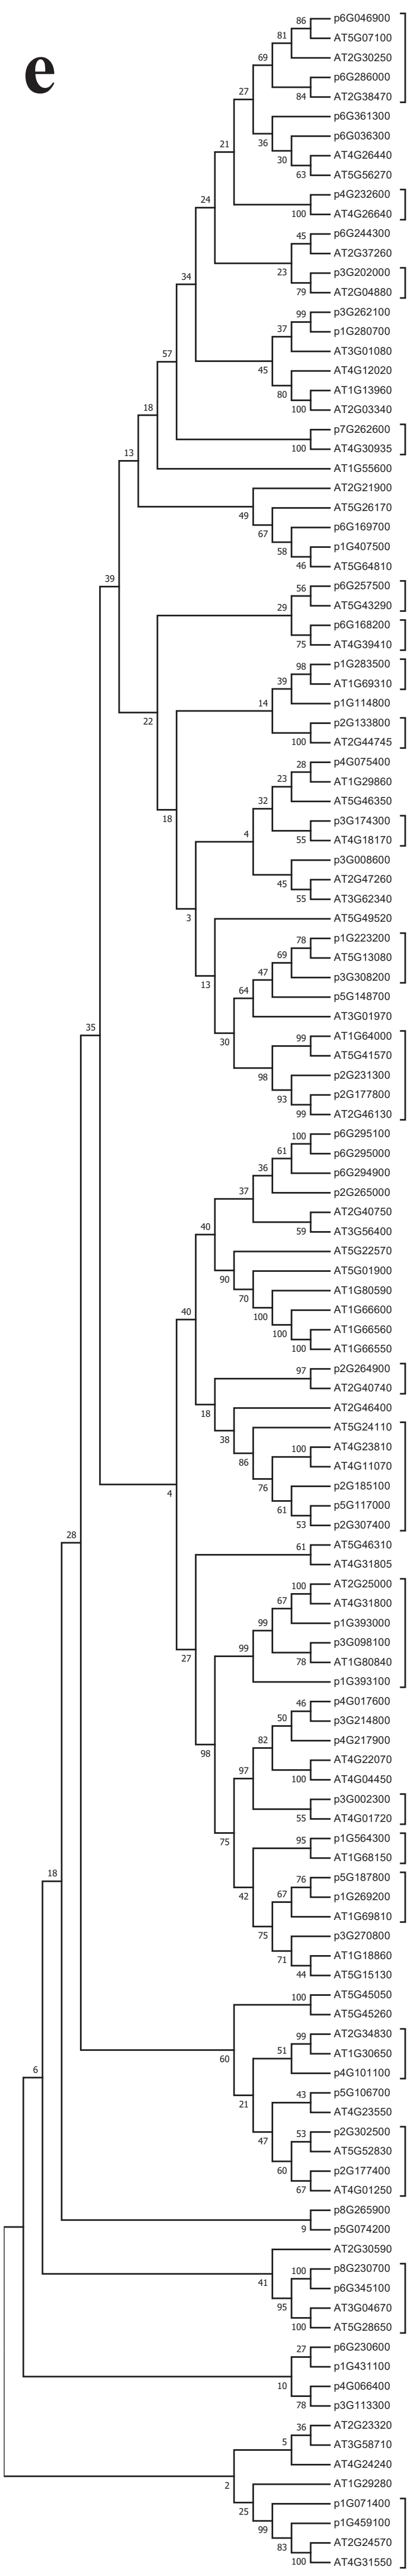

f

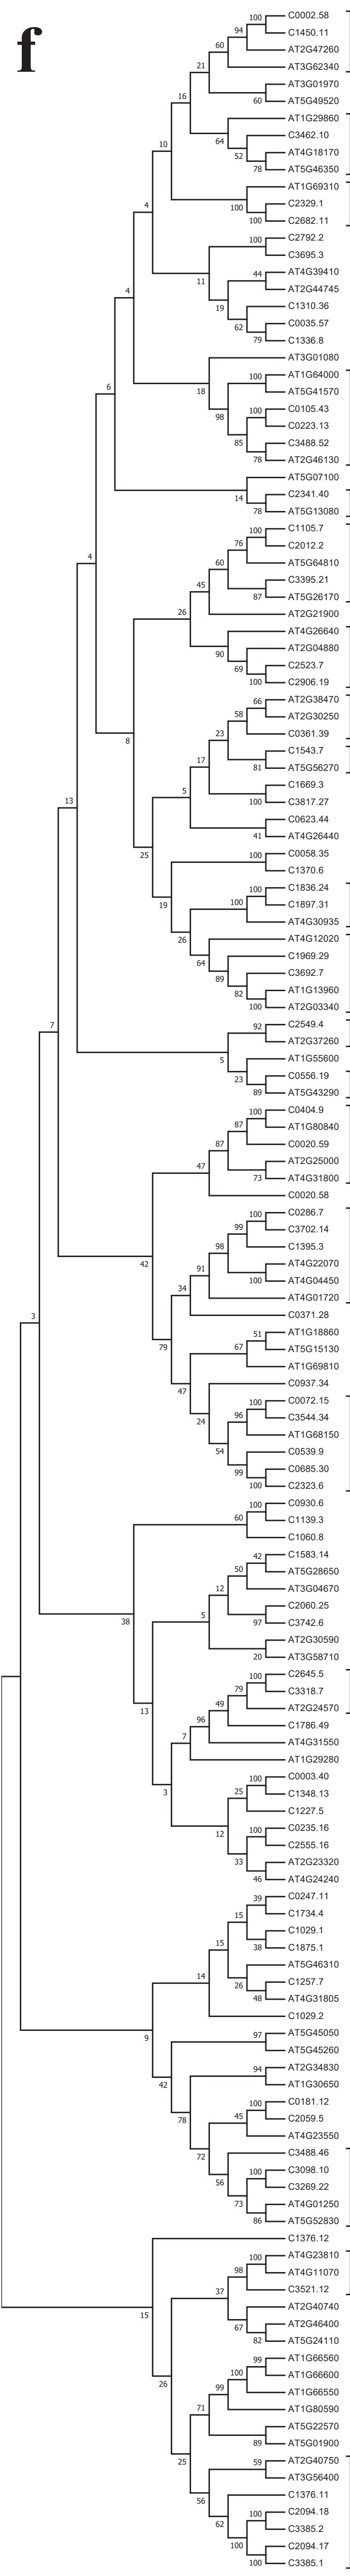

Supplement: f5 [file 4066394.f5.pdf]
